# Supplementary material for: Galactosyltransferase 4 is a major control point for glycan branching in N-linked glycosylation
Source: PubMed Central journal article supplement (PMC4248093; doi:10.1242/jcs.151878), 2014-12-01
Supplement: supp_127.23.5014_JCS151878.pdf [file supp_127.23.5014_JCS151878.pdf]

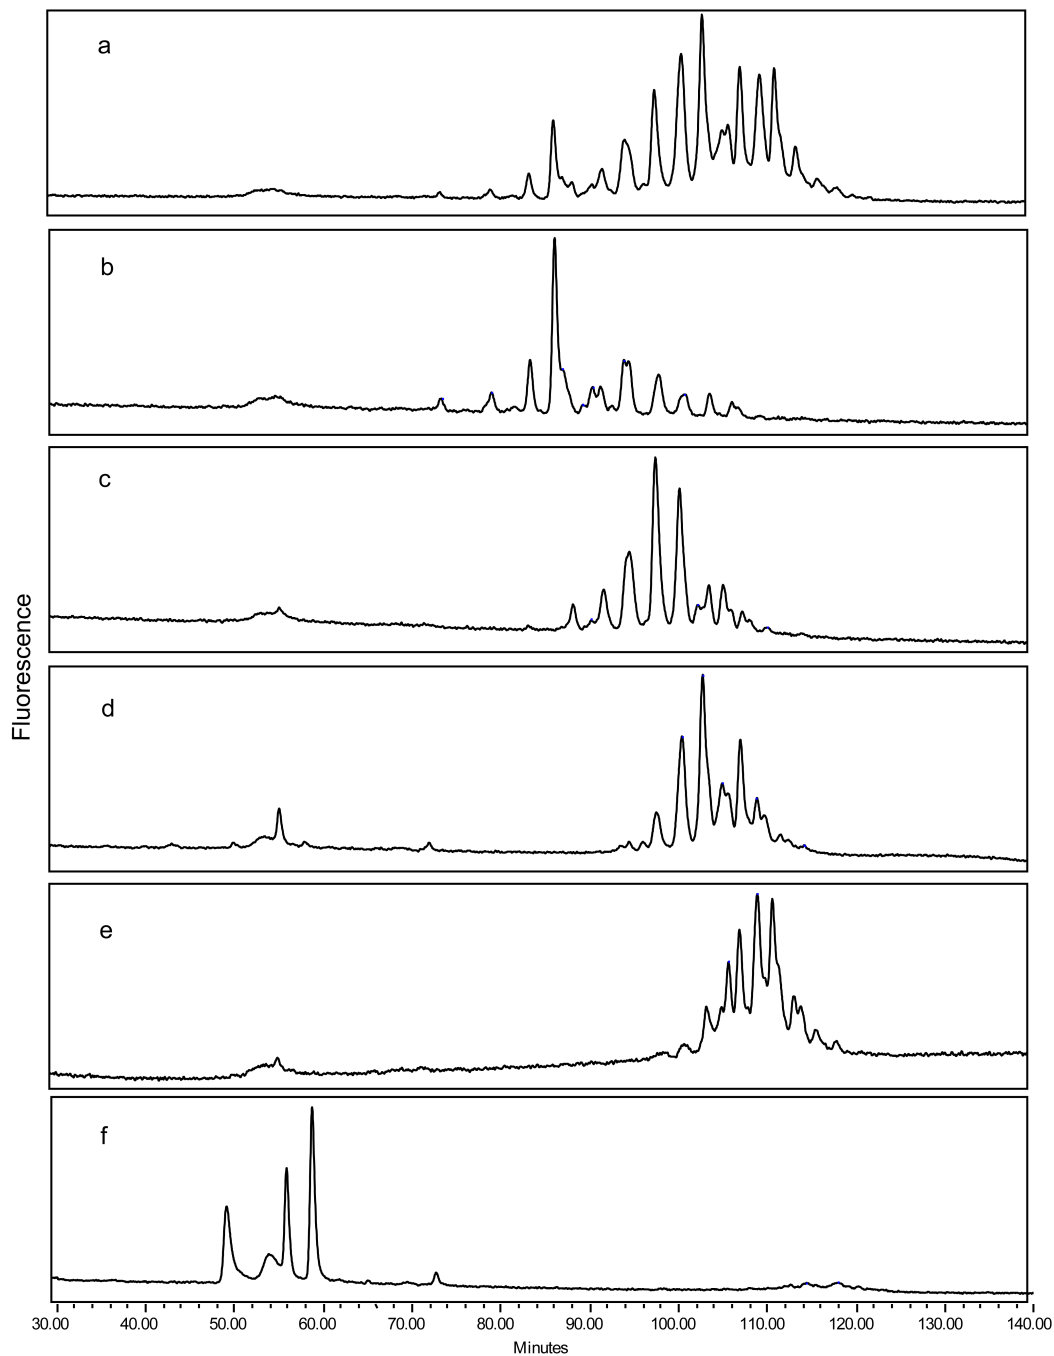

**Fig. S1. Tri-sialylated glycan structures are increased in the CHO-GnT4-GalT4 cell line.** HILIC analysis of WAX fractionated N-glycans from CHO-GnT4-GalT4 cell line. This is a 2-dimensional glycan analysis using WAX in the first dimension and HILIC in the second dimension as a way to deconvolute complex glycan pools for structural assignments. Major increases in tri-antennary structures were observed in this cell line in comparison to hCG purified from CHO cells **a**. Total N-glycan pool; **b**. Neutral fraction; **c**. Mono-sialylated fraction; **d**. Di-sialylated fraction; **e**. Tri-sialylated fraction; **f**. Tetra-sialylated fraction.

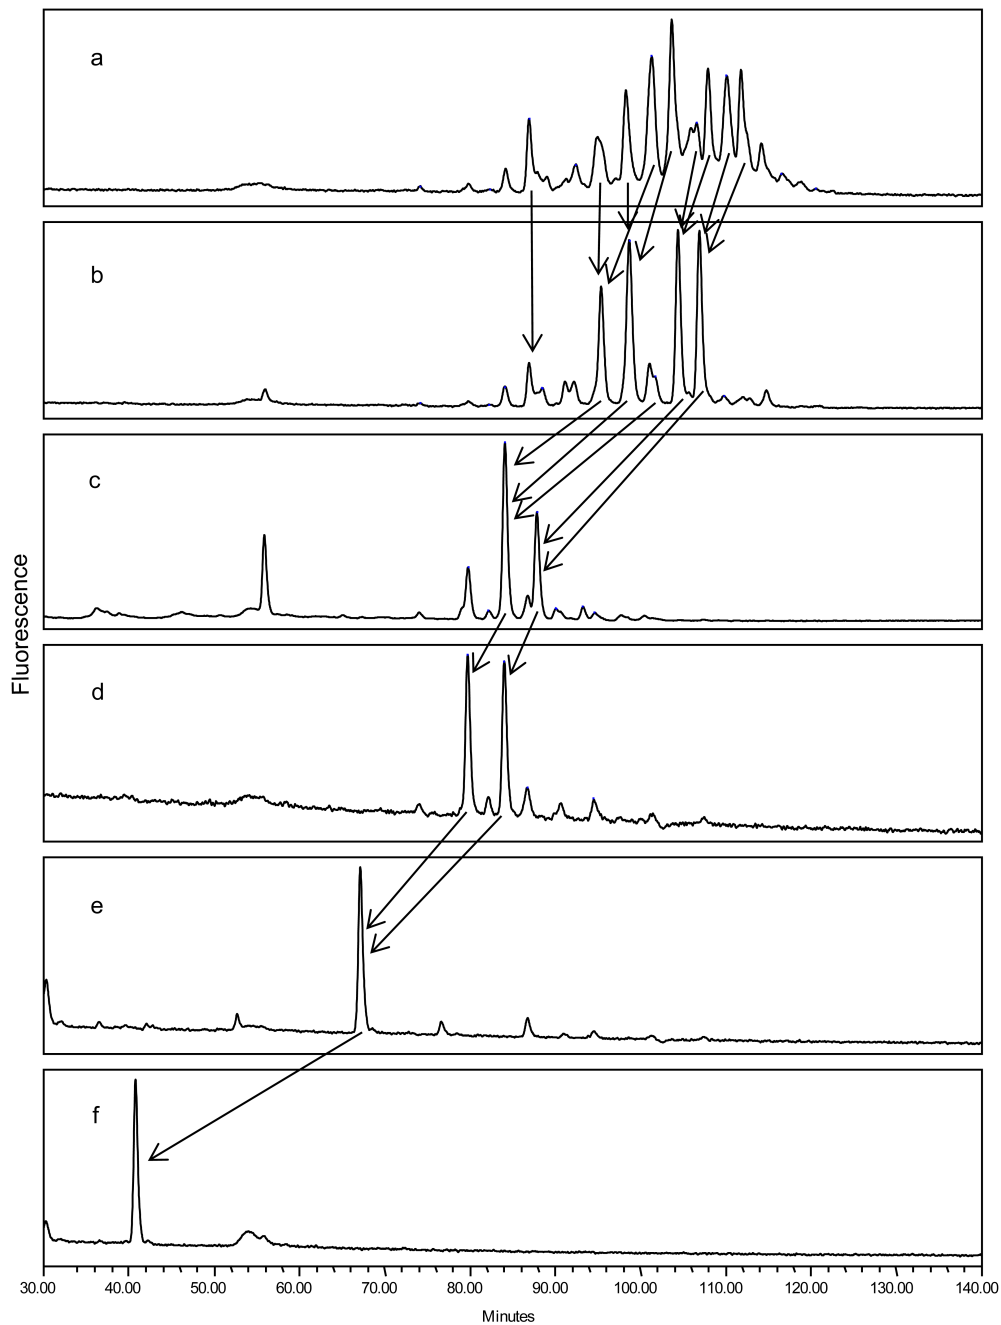

**Fig. S2. Exoglycosidase digestions of N-glycans from CHO-GnT4-GalT4.** **a.** Undigested N-glycan pool; **b.** *Arthrobacter ureafaciens* sialidase (ABS) digest, ABS is specific for  $\alpha$ 2-3/6 linked sialic acids; **c.** ABS + *Streptococcus pneumoniae* (SPG)  $\beta$ -galactosidase digest, SPG is specific for  $\beta$ 1,4-linked galactose residues; **d.** ABS + SPG + bovine kidney fucosidase (BKF) digest, BKF is specific to  $\alpha$ 1,6/2 fucose residues with a preference for core fucoses; **e.** ABS+SPG+BKF+ *S. pneumoniae* N-acetylglucosaminidase (GUH), GUH is specific for  $\beta$ 1,2/4/6-linked GlcNac residues; **f.** ABS+SPG+BKF+GUH+Jack Bean Mannosidase (JBM), JBM is specific for  $\alpha$ 1-2,6,3 mannose residues. Following digestion HILIC-HPLC was used to analyse the composition of the constituent monosaccharides and to determine individual N-glycan structures.

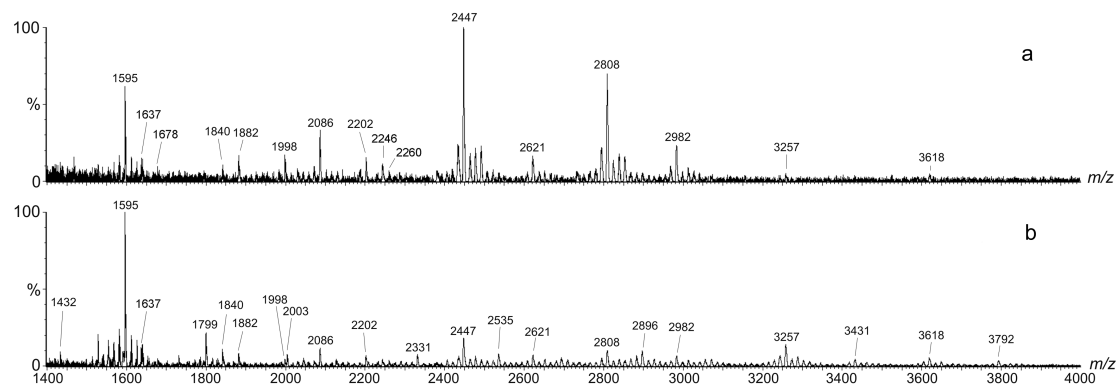

**Fig. S3. MALDI-TOF profiles of reduced and permethylated N-glycans from hCG and CHO-GnT4-GalT4**

Mass spectrometry was used to verify N-glycan structures identified by HILIC. Permethylated N-glycans were analysed using a Waters MALDI Micro MX mass spectrometer with an ultraviolet 337 nm wavelength nitrogen laser. Spectra processing was performed with Waters MassLynx v4.1 software. Ions were observed as  $[M+Na]^+$  adducts. Structures and  $m/z$  values are shown in Table SI. **a.** hCG; **b.** CHO-GnT4-GalT4.

**Table SI. N-glycan structures identified for hCG purified from CHO-GnT4-GalT4 cell lines.**

Structures were determined by a combination of HILIC, WAX-HPLC and exoglycosidase digestions.

| Peak | GU Value | Peak Area (%) | Glycan           |           |                                    |
|------|----------|---------------|------------------|-----------|------------------------------------|
|      |          |               | Name             | Structure | Observed $m/z$ (M+Na) <sup>+</sup> |
| 1    | 4.94     | 0.21          | A1               |           | 1432.97                            |
| 2    | 5.45     | 0.40          | A2               |           | 1678.00                            |
|      |          | 0.15          | F(6)A1           |           | ND                                 |
| 3    | 5.70     | 0.27          | M4A1             |           | 1636.85                            |
| 4    | 5.89     | 0.35          | F(6)A2           |           | ND                                 |
|      |          | 1.00          | A3               |           | ND                                 |
| 5    | 6.19     | 3.97          | M5               |           | 1595.85                            |
| 6    | 6.29     | 0.97          | F(6)A3           |           | ND                                 |
| 7    | 6.42     | 0.87          | A1G(4)1S(3)1     |           | 1997.92                            |
| 8    | 6.68     | 1.06          | F(6)A2[6]G(4)1   |           | ND                                 |
| 9    | 6.82     | 2.49          | F(6)A2[3]G(4)1   |           |                                    |
| 10   | 7.13     | 0.53          | F(6)A3G(4)1      |           | 2330.85                            |
|      |          | 5.50          | A2G(4)2          |           | 2085.98                            |
| 11   | 7.41     | 0.79          | F(6)A2G(4)1S(3)1 |           | ND                                 |

|    |       |              |                  |                                                                                      |         |
|----|-------|--------------|------------------|--------------------------------------------------------------------------------------|---------|
| 12 | 7.56  | 7.57         | F(6)A2G(4)2      | 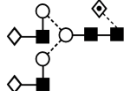  | 2259.77 |
| 13 | 7.97  | 9.50         | A2G(4)2S(3)1     |    | 2246.90 |
|    |       | 2.73         | F(6)A3G(4)1S(3)1 |    | ND      |
| 14 | 8.30  | 12.44        | F(6)A2G(4)2S(3)1 |    | 2620.74 |
|    |       | 0.89         | A3G(4)2S(3)1     |    | ND      |
| 15 | 8.63  | 4.00         | A2G(4)2S(3)2     |    | 2807.48 |
| 16 | 8.73  | 1.15<br>4.26 | F(6)A3G(4)3      |    | ND      |
| 17 | 8.93  |              | M8               |  | ND      |
|    |       | 9.08         | F(6)A2G(4)2S(3)2 |  | 2981.30 |
| 18 | 9.27  | 4.40         | F(6)A3G(4)2S(3)2 |  | ???     |
| 19 | 9.54  | 4.4<br>9.30  | F(6)A3G(4)3S(3)1 |  | 3070.82 |
| 20 | 9.94  | 1.36<br>4.89 | A3G3S2           |  | 3257.77 |
| 21 | 10.35 | 2.09         | A3G3S3           |  | 3618.74 |
| 22 | 10.77 | 1.12         | FA3G3S3          |  | 3792.26 |
